# Supplementary material for: Genome-wide Comparative Analysis of Atopic Dermatitis and Psoriasis Gives Insight into Opposing Genetic Mechanisms
Source: PubMed Central journal article supplement (PMC4289690; doi:10.1016/j.ajhg.2014.12.004), 2015-01-08
Supplement: mmc1.pdf [file mmc1.pdf]

The American Journal of Human Genetics

Supplemental Data

## **Genome-wide Comparative Analysis of Atopic Dermatitis and Psoriasis Gives Insight into Opposing Genetic Mechanisms**

Hansjörg Baurecht, Melanie Hotze, Stephan Brand, Carsten Büning, Paul Cormican, Aiden Corvin, David Ellinghaus, Eva Ellinghaus, Jorge Esparza-Gordillo, Regina Fölster-Holst, Andre Franke, Christian Gieger, Norbert Hubner, Thomas Illig, Alan D. Irvine, Michael Kabesch, Young A.E. Lee, Wolfgang Lieb, Ingo Marenholz, W.H. Irwin McLean, Derek W. Morris, Ulrich Mrowietz, Rajan Nair, Markus M. Nöthen, Natalija Novak, Grainne M. O'Regan, the PAGE Consortium, Stefan Schreiber, Catherine Smith, Konstantin Strauch, Philip E. Stuart, Richard Trembath, Lam C. Tsoi, Michael Weichenthal, Jonathan Barker, James T. Elder, Stephan Weidinger, Heather J. Cordell, and Sara J. Brown

## **Supplemental Consortia Information**

### **Membership of the PAGE (Population Architecture using Genomics and Epidemiology) consortium**

#### ***University of Michigan (UMich)***

Trilokraj Tejasvi,<sup>1</sup> Johann E. Gudjonsson,<sup>1</sup> John J Voorhees,<sup>1</sup> Jun Ding,<sup>2</sup>  
Yanming Li,<sup>2</sup> Hyun M Kang,<sup>2</sup> Goncalo R Abecasis<sup>2</sup>

<sup>1</sup> Department of Dermatology, University of Michigan Ann Arbor, MI 48109, USA

<sup>2</sup> Department of Biostatistics, Center for Statistical Genetics, University of Michigan Ann Arbor, MI 48109, USA

#### ***University of Toronto (UToronto)***

Dafna D Gladman,<sup>3</sup> Fawnda J Pellett,<sup>3</sup> Vinod Chandran,<sup>3</sup> Cheryl F Rosen<sup>4</sup>

<sup>3</sup> Department of Medicine, Division of Rheumatology, University of Toronto, Toronto Western Hospital, Toronto, Ontario M5T 2S8, Canada

<sup>4</sup> Department of Medicine, Division of Dermatology, University of Toronto, Toronto Western Hospital, Toronto, Ontario M5T2S8, Canada

#### ***Memorial University (MU)***

Proton Rahman<sup>5</sup>

<sup>5</sup> Department of Medicine, Memorial University, St. John's, Newfoundland A1C 5B8, Canada

#### ***University of Tartu (UTartu) and Estonian Genome Center University of Tartu (EGCUT)***

Sulev Koks,<sup>6</sup> Külli Kingo,<sup>7</sup> Tonu Esko,<sup>8</sup> Andres Metspalu<sup>8</sup>

<sup>6</sup> Department of Physiology, Centre of Translational Medicine and Centre for Translational Genomics, University of Tartu, 50409 Tartu, Estonia

<sup>7</sup> Department of Dermatology and Venerology, University of Tartu, 50409 Tartu, Estonia

<sup>8</sup> Estonian Genome Center and Center of Translational Genomics; Estonian Biocenter; Institute of Molecular and Cell Biology, University of Tartu, 50409 Tartu, Estonia

#### ***The Feinstein Institute for Medical Research (FIMR)***

Peter Gregersen<sup>9</sup>

<sup>9</sup> Robert S. Boas Center for Genomics and Human Genetics, The Feinstein Institute for Medical Research, Manhasset, NY 11030

#### ***National Psoriasis Victor Henschel BioBank (NPF)***

Andrew Henschel,<sup>10</sup> Marin Aurand,<sup>10</sup> Bruce Bebo<sup>10</sup>

<sup>10</sup> National Psoriasis Foundation, Portland, OR 97223 USA;

#### ***Henry Ford Hospital (HFH)***

Henry W Lim<sup>11</sup>

<sup>11</sup> Henry Ford Hospital, Detroit, Michigan, 48202, USA

## Supplemental Figures

Figure S1. CCMA calibration curve

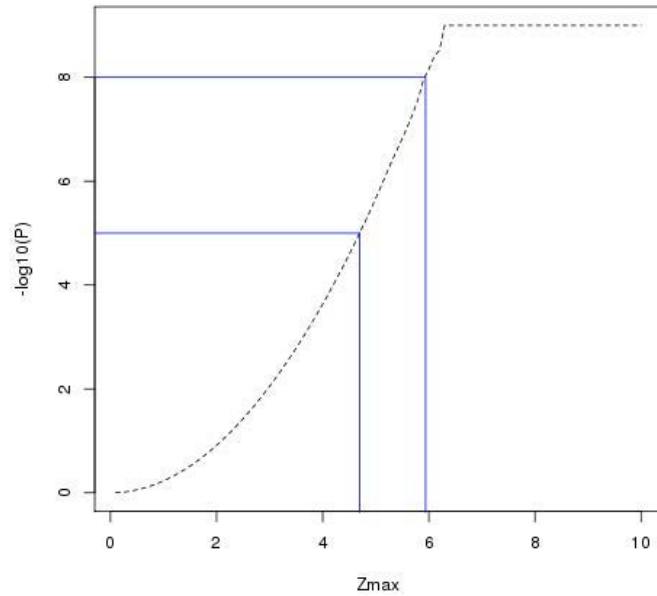

Calibration curve of the  $Z_{\max}$  statistic based on  $10^9$  simulation replicates. Thresholds of  $Z_{\max}=4.7$  and  $Z_{\max}=6.0$  correspond to approximate genome-wide “suggestive” and “significant” thresholds ( $P=1 \times 10^{-5}$  and  $1 \times 10^{-8}$ ) respectively.

**Figure S2. Mirrored Manhattan Plot of CCMA (upper panel) and MANTRA analysis (lower panel)**

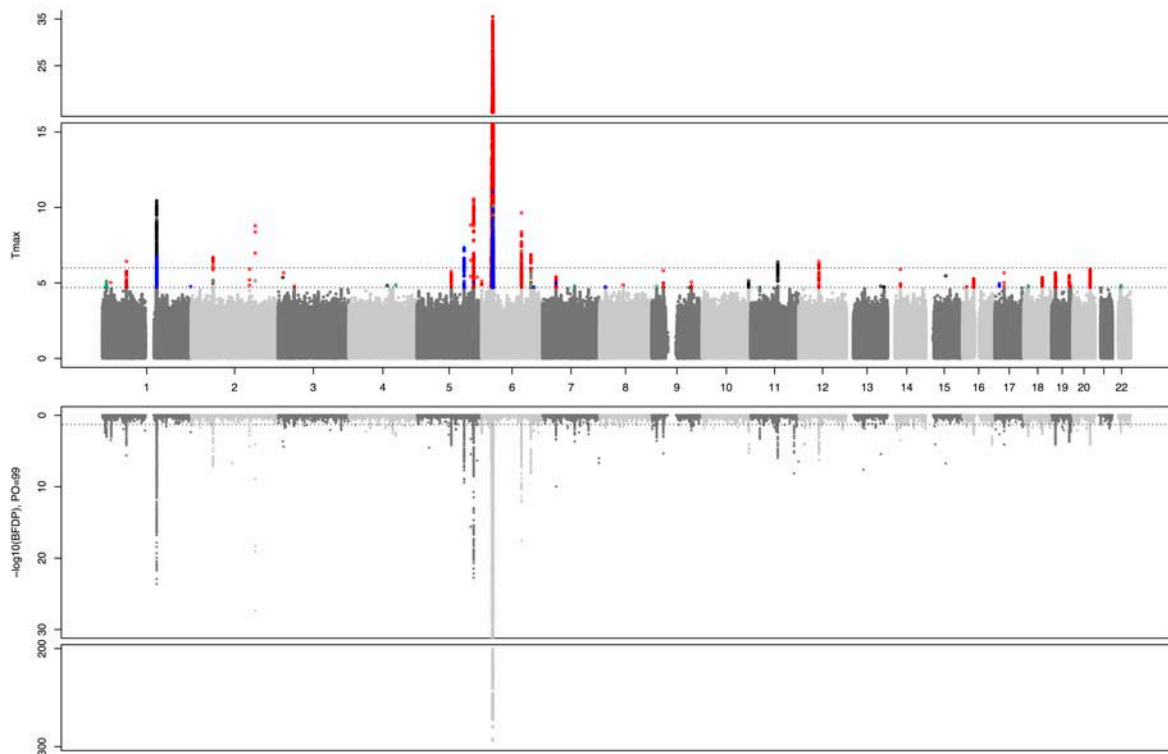

In the case-control meta-analysis (CCMA) the SNVs are color-coded as follows: **red** indicates psoriasis-specific; **black** AD-specific; **blue** opposing effect; **green** shared effect; the genome-wide significance threshold is indicated at  $T_{max}=6.0$  (suggestive significance at  $T_{max}=4.7$ ) for CCMA and Bayesian False Discovery Probability BFDP=0.05 for MANTRA.

**Figure S3. Agreement of CCMA and MNM effect classification**

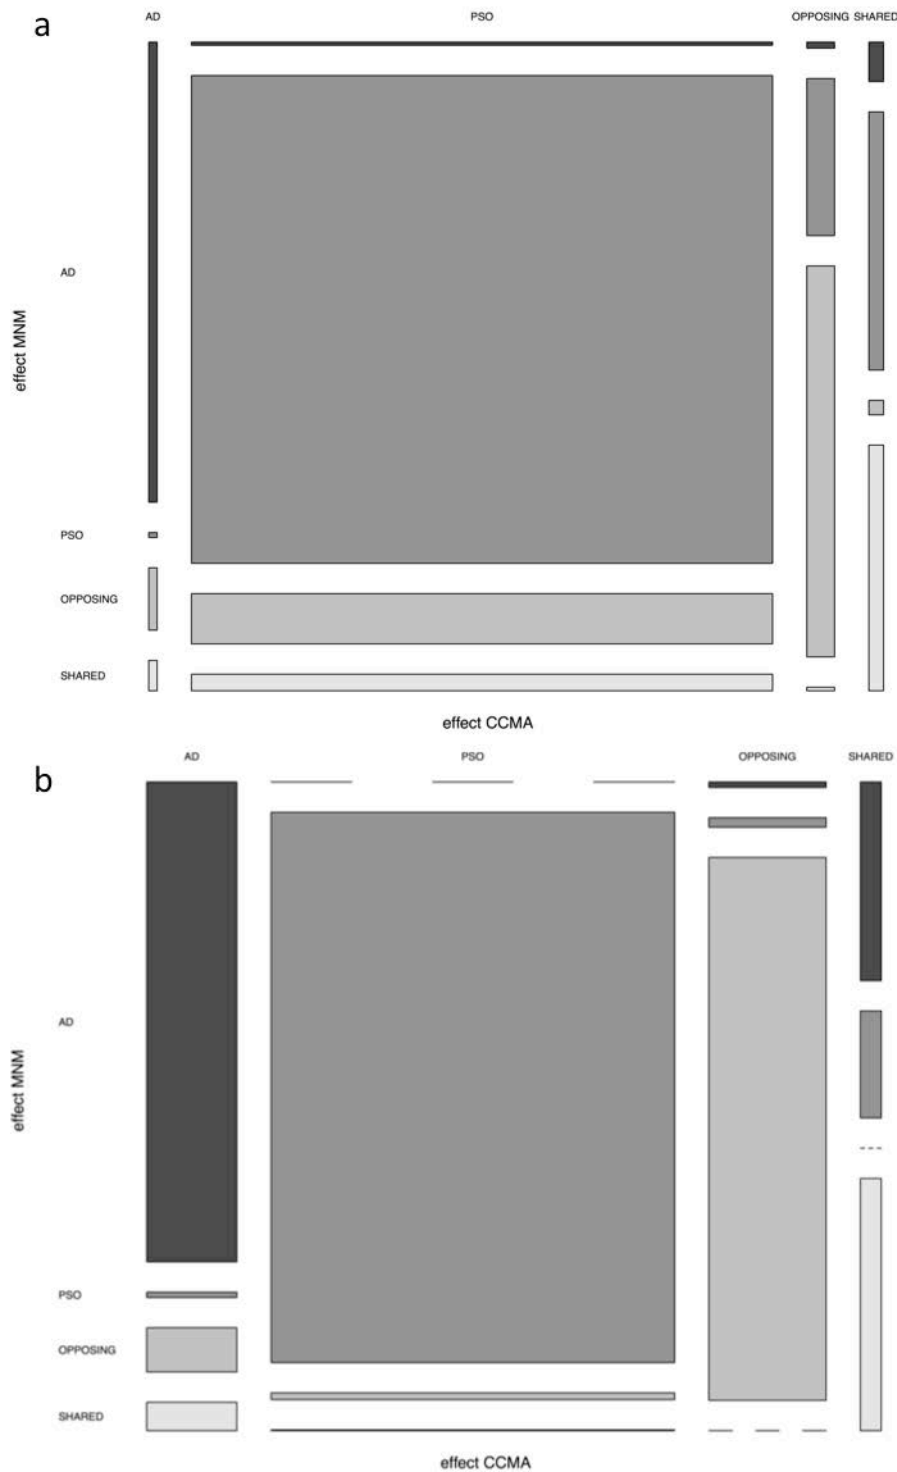

Mosaic plot showing the agreement of SNV effect classification into AD, psoriasis (PSO), shared and opposing effects for filtered SNVs ( $T_{max} > 4.7$ ) using CCMA and the multinomial models (MNM); (a) genome-wide comparison of both methods revealed 85.6% agreement, and (b) excluding the complex HLA region the comparison showed 94.8% agreement.

**Figure S4: Association Plot and LD Structure of the EDC (left) and 5q31.1 (right)**

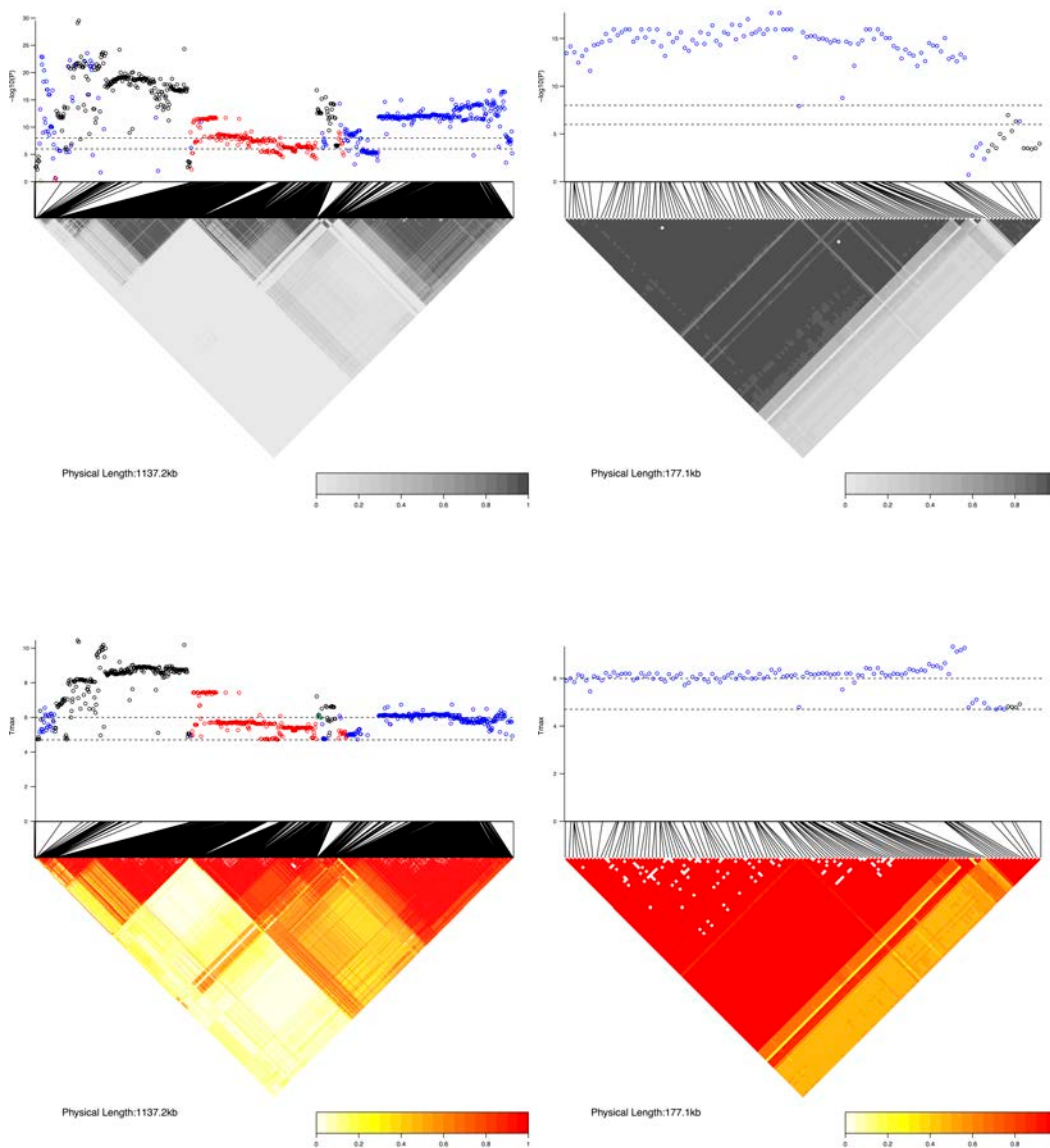

The upper plots display  $-\log_{10}(P)$  from the multinomial regression model and  $R^2$  LD values; the lower plots display  $T_{\max}$  from the CCMA and  $D'$  LD values; dashed lines indicate suggestive and genome-wide significance thresholds; color codes: **red**=psoriasis, **black**=AD, and **blue**=opposing effect.

**Figure S5: Association Plot and LD Structure of the cytokine cluster at 5q31.1 using Immunochip data**

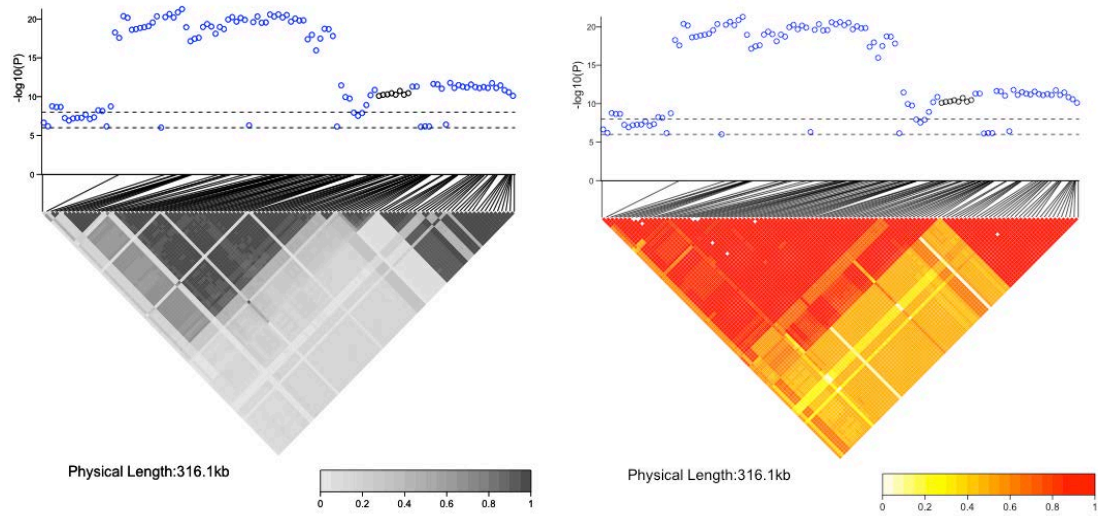

$R^2$  (left) and  $D'$  (right) together with  $-\log_{10}(P)$  from the multinomial regression model are displayed; color codes: **black**=AD-specific effect and **blue**=opposing effect on AD and psoriasis.

**Figure S6: Predicted protein network and gene ontology analyses**

**(a) 32 protein products & interactions predicted from 33 genes showing significance in genome-wide and/or conditional analyses**

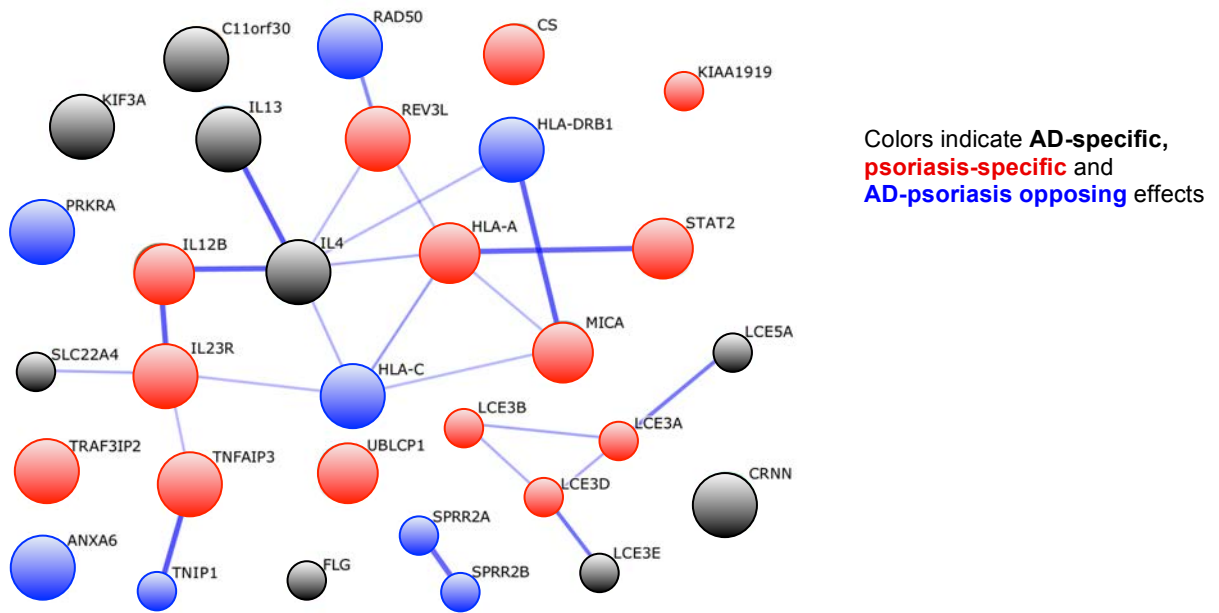

|            |                                                |     |            |
|------------|------------------------------------------------|-----|------------|
| GO:0031424 | keratinization                                 | n=7 | p=3.08E-08 |
| GO:0030216 | keratinocyte differentiation                   | n=8 | p=3.08E-08 |
| GO:0009913 | epidermal cell differentiation                 | n=8 | p=2.64E-07 |
| GO:0008544 | epidermis development                          | n=8 | p=4.90E-05 |
| GO:0043588 | skin development                               | n=8 | p=1.11E-04 |
| GO:2000319 | regulation of T-helper 17 cell differentiation | n=3 | p=1.50E-04 |
| GO:2000316 | regulation of T-helper 17 type immune response | n=3 | p=2.57E-04 |

**(b) 17 protein products & interactions predicted from 18 genes showing significant association with AD (AD-specific and opposing)**

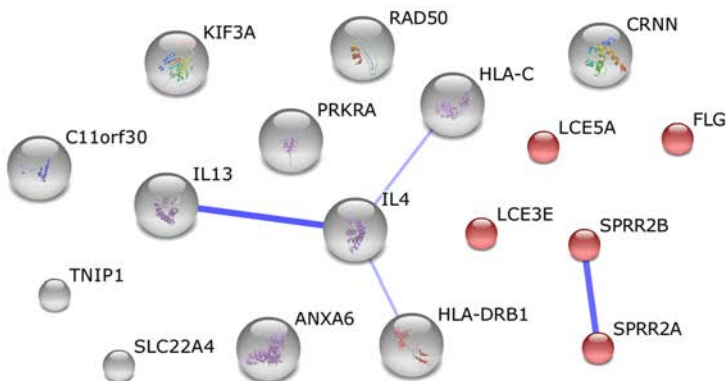

|            |                                     |                       |            |
|------------|-------------------------------------|-----------------------|------------|
| GO:0030216 | <b>keratinocyte differentiation</b> | <b>n=5 marked red</b> | p=4.30E-04 |
| GO:0031424 | keratinization                      | n=4                   | p=6.94E-04 |
| GO:0009913 | epidermal cell differentiation      | n=5                   | p=6.94E-04 |
| GO:0008544 | epidermis development               | n=5                   | p=1.60E-02 |
| GO:0043588 | skin development                    | n=5                   | p=2.46E-02 |



**(c) 23 protein products & interactions predicted from 24 genes showing significant association with psoriasis (psoriasis-specific and opposing)**

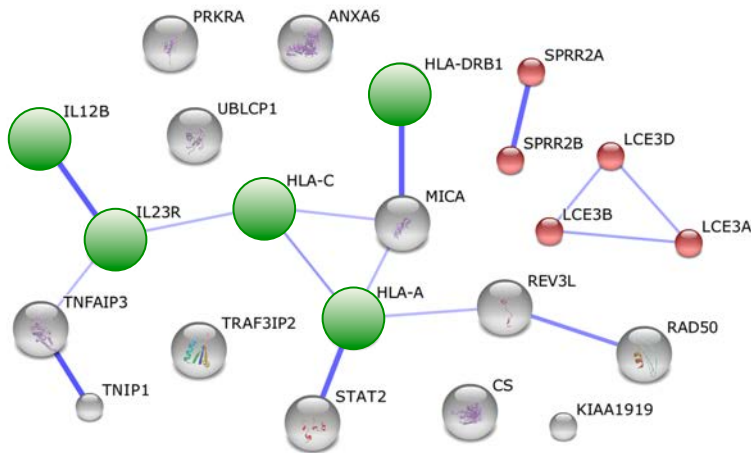

|            |                                         |                         |            |
|------------|-----------------------------------------|-------------------------|------------|
| GO:0031424 | <b>keratinization</b>                   | <b>n=5 marked red</b>   | p=4.77E-05 |
| GO:0030216 | <b>keratinocyte differentiation</b>     | <b>n=5 marked red</b>   | p=6.94E-04 |
| GO:0009913 | epidermal cell differentiation          | n=5                     | p=1.89E-03 |
| GO:0034341 | <b>response to interferon-gamma</b>     | <b>n=5 marked green</b> | p=1.89E-03 |
| GO:0050688 | regulation of defense response to virus | n=4                     | p=8.11E-03 |

**(d) 9 protein products from 12 genes showing opposing actions in AD and psoriasis**

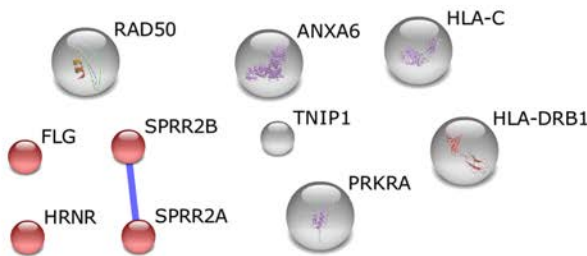

|            |                                       |                       |            |
|------------|---------------------------------------|-----------------------|------------|
| GO:0030216 | <b>keratinocyte differentiation</b>   | <b>n=4 marked red</b> | p=2.70E-03 |
| GO:0009913 | <b>epidermal cell differentiation</b> | <b>n=4 marked red</b> | p=4.78E-03 |
| GO:0031424 | keratinization                        | n=3                   | p=1.24E-02 |
| GO:0061436 | establishment of skin barrier         | n=2                   | p=3.02E-02 |
| GO:0008544 | epidermis development                 | n=4                   | p=3.02E-02 |
| GO:0033561 | regulation of water loss via skin     | n=2                   | p=4.55E-02 |

Genes identified from the results of analyses presented in Tables 1, 2 and 3; STRING<sub>9.1</sub> <http://string-db.org/> accessed 17 July 2014; these are confidence views in which stronger associations are represented by thicker lines; n=number of genes; p values are corrected by FDR.

## Supplemental Tables

**Table S1. Case and control collections for AD and psoriasis**

| Panel                  | Numbers        | Collection                              | Platform       | Previous publications |
|------------------------|----------------|-----------------------------------------|----------------|-----------------------|
| <b>GWAS data</b>       |                |                                         |                |                       |
| A                      | AD 663         | Munich/ Bonn                            | Illumina 300k  | <sup>1</sup>          |
| <i>Germany</i>         | Controls 786   | PopGen/ ISAAC                           |                |                       |
| B                      | AD 993         | Munich/ Kiel/ Berlin                    | Affymetrix 6.0 | <sup>2</sup>          |
| <i>Germany</i>         | Controls 1513  | KORA                                    |                |                       |
| C                      | AD 606         | Dublin/ Dundee                          | Illumina 610k  | <sup>1; 3</sup>       |
| <i>Ireland</i>         | Controls 1794  | TRINITY (Dublin)                        | Affymetrix 6.0 |                       |
| D                      | Psoriasis 492  | Kiel                                    | Illumina 550k  | <sup>4</sup>          |
| <i>Germany</i>         | Controls 1161  | PopGen/ KORA                            |                |                       |
| E                      | Psoriasis 2622 | WTCCC2                                  | Illumina 1M    | <sup>5-7</sup>        |
| <i>United Kingdom</i>  | Controls 5667  |                                         |                |                       |
| F                      | Psoriasis 1375 | CASP                                    | Perlegen       | <sup>8</sup>          |
| <i>United States</i>   | Controls 1412  |                                         |                |                       |
| <b>ImmunoChip data</b> |                |                                         |                |                       |
| <i>Germany</i>         | AD 2425        | Munich/ Bonn/ Berlin                    | ImmunoChip     | <sup>3; 5</sup>       |
|                        | Psoriasis 572  | Kiel                                    |                |                       |
|                        | Controls 5449  | PopGen/ KORA/ HNR/ Munich/ Berlin/ Bonn |                |                       |
| <i>United States</i>   | Psoriasis 1351 | UMich/NPH/HFH                           |                |                       |
|                        | Controls 2694  | UMich/FIMR/NPH                          |                |                       |
| <i>Canada</i>          | Psoriasis 362  | UToronto/MU                             |                |                       |
|                        | Controls 20    | UToronto                                |                |                       |
| <i>Estonia</i>         | Psoriasis 1295 | UTartu/ EGCUT                           |                |                       |
|                        | Controls 898   | EGCUT                                   |                |                       |

PopGen, PopGen biorepository; ISAAC, International Study of Asthma and Allergies in Childhood; TRINITY, Trinity Biobank Controls, Dublin, Ireland; WTCCC2, Wellcome Trust Case Control Consortium 2; HNR, Heinz Nixdorf Recall study; CASP, Collaborative Association Study of Psoriasis; UMich, University of Michigan; HFH, Henry Ford Hospital, NPH, National Psoriasis Foundation Victor Henschel BioBank; FIMR, The Feinstein Institute for Medical Research; UToronto, University of Toronto; MU, Memorial Hospital Newfoundland; UTartu, University of Tartu; EGCUT, Estonian Genome Center University of Tartu.

**Table S2. Summary data before imputation**

| <b>Data set</b>              | <b># Individuals</b> | <b>Cases</b> | <b>Controls</b> | <b># SNPs before QC</b> | <b># SNPs after QC</b> |
|------------------------------|----------------------|--------------|-----------------|-------------------------|------------------------|
| German AD Illumina           | 1,381                | 615          | 766             | 275,099                 | 264,658                |
| German AD Affymetrix         | 2,196                | 892          | 1,304           | 783,889                 | 481,680                |
| Irish AD Illumina/Affymetrix | 2,369                | 572          | 1,797           | 143,001                 | 131,629                |
| German Psoriasis             | 1,598                | 475          | 1,123           | 561,466                 | 493,992                |
| UK Psoriasis                 | 7,893                | 2,382        | 5,511           | 542,011                 | 508,084                |
| US Psoriasis                 | 2,753                | 1,355        | 1,398           | 599,164                 | 327,097                |
|                              | 18,190               | 6,291        | 11,834          |                         |                        |

**Table S3. Summary data after imputation**

| <b>Cohort</b>                | <b>#SNPs after imputation</b> | <b># SNPs failed imputation QC</b> | <b># SNPs after imputation QC</b> |
|------------------------------|-------------------------------|------------------------------------|-----------------------------------|
| German AD Illumina           | 5,513,905                     | 84,450                             | 5,429,455                         |
| German AD Affymetrix         | 5,552,779                     | 75,913                             | 5,476,866                         |
| Irish AD Illumina/Affymetrix | 5,489,685                     | 353,166                            | 5,136,519                         |
| German Psoriasis             | 5,559,007                     | 76,170                             | 5,482,837                         |
| UK Psoriasis                 | 5,562,502                     | 69,402                             | 5,493,100                         |
| US Psoriasis                 | 5,534,690                     | 79,330                             | 5,455,360                         |

**Table S4. Components of the prior matrix for MANTRA**

*D<sub>Ethnicity</sub>*

|      | gerA   | gerI   | Ire    | gerP   | UK     | US |
|------|--------|--------|--------|--------|--------|----|
| gerA | 0      |        |        |        |        |    |
| gerI | 0.0021 | 0      |        |        |        |    |
| Ire  | 0.0194 | 0.0194 | 0      |        |        |    |
| gerP | 0.0033 | 0.0024 | 0.0191 | 0      |        |    |
| UK   | 0.0109 | 0.0115 | 0.0105 | 0.0107 | 0      |    |
| US   | 0.0061 | 0.0072 | 0.0143 | 0.0072 | 0.0053 | 0  |

*D<sub>Disease</sub>*

|      | gerA | gerI | Ire  | gerP | UK | US |
|------|------|------|------|------|----|----|
| gerA | 0    |      |      |      |    |    |
| gerI | 0    | 0    |      |      |    |    |
| Ire  | 0.02 | 0.02 | 0    |      |    |    |
| gerP | 0.04 | 0.04 | 0.04 | 0    |    |    |
| UK   | 0.04 | 0.04 | 0.04 | 0    | 0  |    |
| US   | 0.04 | 0.04 | 0.04 | 0    | 0  | 0  |

*D<sub>Total</sub>*

|      | gerA   | gerI   | Ire    | gerP   | UK     | US |
|------|--------|--------|--------|--------|--------|----|
| gerA | 0      |        |        |        |        |    |
| gerI | 0.0021 | 0      |        |        |        |    |
| Ire  | 0.0394 | 0.0394 | 0      |        |        |    |
| gerP | 0.0433 | 0.0424 | 0.0591 | 0      |        |    |
| UK   | 0.0509 | 0.0515 | 0.0505 | 0.0107 | 0      |    |
| US   | 0.0461 | 0.0472 | 0.0543 | 0.0072 | 0.0053 | 0  |

The disease prior for the MANTRA method was specified by two components (a)  $D_{\text{Ethnicity}}$  showing the Euclidean distances between study centers based on the genetic distance derived by the MDS analysis of the IBS matrix and (b)  $D_{\text{Disease}}$  an arbitrary distance set to distinguish both diseases (see **Methods** section). gerA: German Affymetrix AD cohort (Panel B); gerA: German Illumina AD cohort (Panel A); Ire: Irish AD cohort (Panel C); gerP: German psoriasis cohort (Panel D); UK: UK psoriasis cohort (Panel E); US: US psoriasis cohort (Panel F).

**Table S5. Results of CCMA and MNM analyses showing significance levels and comparison with known susceptibility loci for AD and psoriasis**

***[Supplemental Table 5 provided as Excel file]***

Lead SNP defined by clumping procedure (Purcell, S. et al. PLINK: a tool set for whole-genome association and population-based linkage analyses. *Am J Hum Genet* 81, 559-75 2007); genome-wide significant results defined as  $T_{max} > 6$ ,  $B_{FDP} < 0.05$  with  $P_{O} = 1/999$  or  $P_{MNM} < 10^{-8}$  are marked in bold; genes and transcripts identified from UCSC Genome Browser Human Feb. 2009 (GRCh37/hg19) Assembly accessed 21 March 2014.

**Table S6. Summary of previous GWAS findings and comparison with our findings**

**S6(a) Atopic Dermatitis**

| Locus                                     | Reported gene(s)               | Reported SNV(s)                       | Associated SNV in region (+/-250kb) | Position  | EA / RA  | OR (95% CI)        | P-value  | Reference         | SNV represented in disease-specific/comparative analyses? |
|-------------------------------------------|--------------------------------|---------------------------------------|-------------------------------------|-----------|----------|--------------------|----------|-------------------|-----------------------------------------------------------|
| 1q21.3                                    | <i>tags FLG signal</i>         | rs3126085                             | rs11205006                          | 152440176 | A/T      | 1.615(1.543-1.691) | 1.57E-25 | <sup>2, 9</sup>   | 913/280                                                   |
| 2q12.1                                    | <i>IL18R1, IL18RAP, SLC9A4</i> | rs13015714 <sup>a</sup><br>rs759382   | rs759382                            | 103094213 | T/G      | 0.857(0.815-0.9)   | 0.0017   | <sup>3, 10</sup>  | 1361/0                                                    |
| 4q27                                      | <i>IL2, IL21</i>               | rs17389644                            | rs17389644                          | 123497697 | A/G      | 1.208(1.119-1.304) | 1.16E-06 | <sup>3</sup>      | 550/13                                                    |
| 5q31.1                                    | <i>RAD50, IL13, IL4, KIF3A</i> | rs1295686 <sup>a</sup><br>rs2897442   | rs1295686                           | 131995843 | T/C      | 1.347(1.28-1.418)  | 5.30E-09 | <sup>10, 11</sup> | 765/121                                                   |
| 6p21.33                                   | <i>HLA-C, HLA-B, MICA</i>      | rs9368677 <sup>a</sup><br>rs2251396   | rs148203517                         | 31324100  | T/G      | 1.305(1.239-1.375) | 2.95E-07 | <sup>1, 10</sup>  | 8172/6065                                                 |
| 6p21.33                                   | <i>BAT1</i>                    | rs2844509                             | rs2844509                           | 31510924  | A/G      | 1.211(1.097-1.337) | 1.50E-04 | <sup>1</sup>      | 5429/3596                                                 |
| 6p21.33                                   | <i>C6orf48</i>                 | rs9368699                             | rs9368699                           | 31802541  | C/T      | 0.657(0.534-0.809) | 7.78E-05 | <sup>1</sup>      | 719/366                                                   |
| 6p21.33                                   | <i>TNXB, CREBL1</i>            | rs12153855                            | rs12153855                          | 32074804  | C/T      | 0.781(0.679-0.898) | 5.19E-04 | <sup>1</sup>      | 1755/1027                                                 |
| 11p12                                     | <i>PRR5L</i>                   | rs12295535                            | rs12295535                          | 36432024  | T/C      | 1.382(1.202-1.589) | 0.0204   | <sup>3</sup>      | 1141/1                                                    |
| 11q13.1                                   | <i>OVOL1</i>                   | rs479844                              | rs479844                            | 65551957  | A/G      | 0.851(0.815-0.889) | 2.06E-04 | <sup>10, 11</sup> | 838/0                                                     |
| 11q13.5                                   | <i>C11orf30, LRRC32</i>        | rs7927894,<br>rs11236809 <sup>a</sup> | rs7927894                           | 76301316  | T/C      | 1.265(1.21-1.322)  | 1.24E-07 | <sup>2, 10</sup>  | 1104/48                                                   |
| 16p13.13                                  | <i>CLEC16A</i>                 | rs9923856 <sup>a</sup><br>rs2041733   | rs2041733                           | 11229589  | T/C      | 1.172(1.124-1.222) | 1.51E-04 | <sup>3, 10</sup>  | 1292/2                                                    |
| 17q21.32-33                               | <i>ZNF652</i>                  | rs16948048                            | rs16948048                          | 47440466  | G/A      | 1.101(1.012-1.198) | 0.0252   | <sup>3</sup>      | 991/0                                                     |
| 19p13.2                                   | <i>ACTL9</i>                   | rs2164983                             | rs2164983                           | 8789381   | A/C      | 1.129(0.999-1.275) | 0.0521   | <sup>11</sup>     | 1002/0                                                    |
| 20q13.33                                  | <i>TNFRSF6B</i>                | rs909341                              | rs909341                            | 62328742  | G/A      | 1.316(1.205-1.429) | 7.73E-10 | <sup>3</sup>      | 1226/0                                                    |
| <b>Loci reported in Asian populations</b> |                                |                                       |                                     |           |          |                    |          |                   |                                                           |
| 3p22.3                                    | <i>GLB1</i>                    | rs7613051                             | rs1607463                           | 32910192  | A/T      | 1.471(1.294-1.673) | 0.0027   | <sup>10</sup>     | 1032/0                                                    |
| 3q13.2                                    | <i>CCDC80</i>                  | rs12634229                            | rs58161637                          | 112545910 | G/G<br>T | 1.214(1.16-1.27)   | 2.21E-05 | <sup>10</sup>     | 1038/0                                                    |
| 5q22.1                                    | <i>TMEM232, SLC25A46</i>       | rs7701890                             | rs4957919                           | 110100063 | T/C      | 1.195(1.117-1.28)  | 0.0089   | <sup>9</sup>      | 909/0                                                     |
| 6p21.32                                   | <i>GPSM3</i>                   | rs176095                              | rs176095                            | 32158319  | G/A      | 0.768(0.694-0.85)  | 3.44E-07 | <sup>10</sup>     | 2622/1554                                                 |
| 6p21.32                                   | <i>C6orf10</i>                 | rs9469099                             | rs41268896                          | 32070069  | A/G      | 1.298(1.238-1.361) | 4.16E-08 | <sup>10</sup>     | 8274/5295                                                 |
| 7p22.2                                    | <i>CARD11</i>                  | rs4722404                             | rs6953573                           | 3081727   | A/G      | 1.194(1.136-1.255) | 3.61E-04 | <sup>10</sup>     | 1813/0                                                    |
| 10q21.2                                   | <i>ZNF365</i>                  | rs10995251                            | rs2393903                           | 64380336  | T/C      | 0.831(0.795-0.869) | 3.42E-05 | <sup>10</sup>     | 951/0                                                     |
| 11p15.4                                   | <i>OR10A3, NLRP10</i>          | rs878860                              | rs4758289                           | 8115699   | T/C      | 1.163(1.099-1.231) | 0.0079   | <sup>10</sup>     | 1752/0                                                    |
| 20q13.2                                   | <i>CYP24A1, PFDN4</i>          | rs16999165                            | rs176383                            | 52613413  | T/C      | 1.356(1.253-1.468) | 1.19E-04 | <sup>10</sup>     | 1286/0                                                    |

EA/RA=effect allele/reference allele; <sup>a</sup>indicate reported Asian SNVs.

**S6(b) Psoriasis**

| Locus    | Reported gene(s)           | Reported SNV(s)                                                                  | Associated SNV in region (+/-250kb) | Position  | EA / RA | OR (95% CI)        | P-value   | Reference        | SNV represented in disease-specific/comparative analyses? |
|----------|----------------------------|----------------------------------------------------------------------------------|-------------------------------------|-----------|---------|--------------------|-----------|------------------|-----------------------------------------------------------|
| 1p36.23  | <i>SLC45A1, TNFRSF9</i>    | rs11121129                                                                       | rs11121129                          | 8268095   | A/G     | 1.131(1.096-1.167) | 8.74E-05  | 5                | 884/25                                                    |
| 1p36.13  | <i>CAPZB</i>               | rs7667                                                                           | rs7667                              | 19718824  | A/G     | 1.079(1.046-1.112) | 0.0131    | 4                | 1127/0                                                    |
| 1p36.11  | <i>IL28RA</i>              | rs4649203                                                                        | rs4649203                           | 24519920  | A/G     | 1.153(1.113-1.195) | 5.81E-05  | 5, 7             | 973/2                                                     |
| 1p36.11  | <i>RUNX3</i>               | rs7536201                                                                        | rs7536201                           | 25293084  | T/C     | 0.883(0.858-0.91)  | 2.37E-05  | 5                | 1051/50                                                   |
| 1p31.3   | <i>IL23R</i>               | rs2201841, rs11209026, rs9988642                                                 | rs11209026                          | 67705958  | A/G     | 0.646(0.598-0.699) | 2.90E-08  | 5, 7, 8          | 1066/60                                                   |
| 1q21.3   | <i>LCE3A, LCE3B, LCE3D</i> | rs4085613 <sup>a</sup> , rs4112788, rs6677595                                    | rs4112788                           | 152551276 | A/G     | 0.791(0.766-0.816) | 8.37E-14  | 5, 7, 12         | 1028/492                                                  |
| 2p16.1   | <i>FLJ16341, REL</i>       | rs702873, rs62149416                                                             | rs702873                            | 61081542  | T/C     | 0.822(0.798-0.847) | 3.22E-11  | 5, 7, 13         | 649/64                                                    |
| 2p15     | <i>B3GNT2</i>              | rs10865331                                                                       | rs10865331                          | 62551472  | A/G     | 1.131(1.067-1.198) | 3.43E-05  | 5                | 836/0                                                     |
| 2q24.2   | <i>IFIH1</i>               | rs17716942                                                                       | rs17716942                          | 163260691 | T/C     | 1.309(1.198-1.433) | 3.26E-09  | 7                | 459/3                                                     |
| 3p24.3   | <i>Intergenic</i>          | rs6809854                                                                        | rs6809854                           | 18784423  | A/G     | 0.885(0.854-0.917) | 5.73E-04  | 7                | 1126/12                                                   |
| 3q13.31  | <i>ZDHHC23</i>             | rs1386478                                                                        | rs1386478                           | 113680951 | A/G     | 1.09(1.022-1.162)  | 0.00894   | 4                | 711/0                                                     |
| 5q15     | <i>ERAP1</i>               | rs27524, rs27432                                                                 | rs27432                             | 96119273  | A/G     | 1.195(1.157-1.234) | 2.37E-08  | 5, 7             | 1199/65                                                   |
| 5q31.1   | <i>IL13, IL4</i>           | rs20541, rs1295685                                                               | rs20541                             | 131995964 | A/G     | 0.841(0.81-0.874)  | 5.39E-06  | 5, 8             | 766/121                                                   |
| 5q33.1   | <i>ANXA6, TNIP1</i>        | rs2233278, rs17728338                                                            | rs17728338                          | 150478318 | A/G     | 1.647(1.557-1.743) | 1.07E-18  | 5, 8             | 1435/3                                                    |
| 5q33.3   | <i>IL12B</i>               | rs2082412, rs3213094 <sup>a</sup> , rs2546890, rs12188300                        | rs2546890                           | 158759900 | A/G     | 1.368(1.328-1.41)  | 5.39E-26  | 5, 8, 12, 14     | 801/218                                                   |
| 6p25.3   | <i>EXOC2, IRF4</i>         | rs9504361                                                                        | rs9504361                           | 577820    | A/G     | 1.163(1.129-1.198) | 2.96E-07  | 5                | 1240/15                                                   |
| 6p21.33  | <i>HLA-C</i>               | rs1265181 <sup>a</sup> , rs12191877, rs4406273, rs10484554, rs3134792, rs2395029 | rs2395029                           | 31431780  | G/T     | 5.00(4.695-5.348)  | 6.84E-138 | 5, 8, 12, 15, 16 | 6809/4811                                                 |
| 6q21     | <i>REV3L</i>               | rs465969                                                                         | rs465969                            | 111655530 | A/G     | 1.403(1.335-1.474) | 7.82E-12  | 7                | 519/226                                                   |
| 6q21     | <i>TRAF3IP2</i>            | rs240993, rs33980500                                                             | rs240993                            | 111673714 | T/C     | 1.282(1.241-1.324) | 1.20E-14  | 7, 14            | 543/235                                                   |
| 6q23.3   | <i>TNFAIP3</i>             | rs582757, rs610604                                                               | rs582757                            | 138197824 | T/C     | 0.802(0.777-0.828) | 5.70E-12  | 5, 7             | 921/60                                                    |
| 6q25.3   | <i>TAGAP</i>               | rs2451258                                                                        | rs2451258                           | 159506600 | T/C     | 0.898(0.871-0.926) | 4.13E-04  | 5                | 1558/4                                                    |
| 7p14.1-2 | <i>ELMO1</i>               | rs2700987                                                                        | rs2700987                           | 37386237  | A/C     | 1.174(1.14-1.209)  | 6.60E-08  | 5                | 1193/27                                                   |
| 9p21.1   | <i>DDX58</i>               | rs11795343                                                                       | rs11795343                          | 32523737  | T/C     | 1.19(1.155-1.226)  | 5.78E-09  | 5                | 893/29                                                    |
| 9q31.2   | <i>KLF4</i>                | rs10979182                                                                       | rs10979182                          | 110817020 | A/G     | 1.149(1.084-1.218) | 2.99E-06  | 5                | 1265/6                                                    |
| 9q34.13  | <i>TSC1</i>                | rs1076160                                                                        | rs1076160                           | 135776034 | T/C     | 1.046(0.988-1.107) | 0.1223    | 8                | 1079/0                                                    |
| 10q22.3  | <i>ZMIZ1</i>               | rs1250546, rs1250544                                                             | rs1250546                           | 81032532  | A/G     | 1.114(1.05-1.182)  | 3.55E-04  | 4, 5             | 1197/0                                                    |
| 11q13.1  | <i>RPS6KA4, PRDX5</i>      | rs645078                                                                         | rs645078                            | 64135298  | A/C     | 1.095(1.032-1.163) | 0.0029    | 5                | 608/0                                                     |
| 11q22.3  | <i>ZC3H12C</i>             | rs4561177                                                                        | rs4561177                           | 109962432 | A/G     | 1.122(1.059-1.189) | 9.03E-05  | 5                | 858/0                                                     |
| 11.q24.3 | <i>ETS1</i>                | rs3802826                                                                        | rs3802826                           | 128406438 | A/G     | 1.116(1.054-1.182) | 1.67E-04  | 5                | 1010/9                                                    |
| 12q13.2  | <i>RPS26</i>               | rs12580100                                                                       | rs12580100                          | 56439209  | A/G     | 1.284(1.171-1.408) | 1.01E-07  | 13               | 315/40                                                    |
| 12q13.3  | <i>IL23A, STAT2</i>        | rs2066808, rs2066819                                                             | rs2066808                           | 56737973  | A/G     | 1.477(1.305-1.671) | 6.45E-10  | 5, 8             | 420/32                                                    |
| 13q14.11 | <i>COG6</i>                | rs7993214                                                                        | rs7993214                           | 40350912  | T/C     | 0.897(0.87-0.925)  | 3.66E-04  | 16               | 1133/0                                                    |
| 14q13.2  | <i>NFKBIA</i>              | rs12586317, rs8016947                                                            | rs8016947                           | 35832666  | T/G     | 0.84(0.815-0.865)  | 3.90E-09  | 7, 13            | 916/8                                                     |
| 16p11.2  | <i>FBXL19, STX1B</i>       | rs10782001, rs12445568                                                           | rs12445568                          | 31004812  | C/T     | 1.167(1.101-1.238) | 2.65E-07  | 5, 13            | 343/100                                                   |

**S6(b) continued**

| Locus                                     | Reported gene(s)                    | Reported SNV(s)                      | Associated SNV in region (+/-250kb) | Position  | EA / RA | OR (95% CI)        | P-value  | Reference         | SNV represented in disease-specific/comparative analyses? |
|-------------------------------------------|-------------------------------------|--------------------------------------|-------------------------------------|-----------|---------|--------------------|----------|-------------------|-----------------------------------------------------------|
| 16p13.13                                  | <i>PRM3, SOCS1</i>                  | rs4780355                            | rs4780355                           | 11347858  | T/C     | 1.165(1.127-1.203) | 3.13E-06 | <sup>4</sup>      | 1655/2                                                    |
| 17q11.2                                   | <i>NOS2</i>                         | rs4795067<br>rs28998802              | rs4795067                           | 26106675  | A/G     | 0.843(0.818-0.869) | 1.47E-08 | <sup>5, 13</sup>  | 836/3                                                     |
| 17q21.2                                   | <i>PTRF, STAT3</i>                  | rs963986                             | rs963986                            | 40561579  | C/G     | 1.158(1.069-1.255) | 3.21E-04 | <sup>5</sup>      | 642/1                                                     |
| 17q25.3                                   | <i>CARD14</i>                       | rs11652075                           | rs11652075                          | 78178893  | T/C     | 0.885(0.86-0.912)  | 3.64E-05 | <sup>5</sup>      | 1347/11                                                   |
| 18q21.2                                   | <i>POL1, STARD6, MBD2</i>           | rs545979                             | rs545979                            | 51819750  | T/C     | 1.172(1.136-1.209) | 3.29E-07 | <sup>5</sup>      | 736/84                                                    |
| 19p13.2                                   | <i>TYK2</i>                         | rs34536443<br>rs12720356<br>rs280519 | rs34536443                          | 10463118  | G/C     | 1.76(1.46-2.10)    | 3.4E-10  | <sup>5, 7</sup>   | 902/29                                                    |
| 19p13.2                                   | <i>ILF3, CARM1</i>                  | rs892085                             | rs892085                            | 10818092  | A/G     | 1.172(1.103-1.245) | 3.13E-07 | <sup>5</sup>      | 810/42                                                    |
| 20q13.12                                  | <i>SDC4</i>                         | rs1008953                            | rs1008953                           | 43980726  | C/T     | 1.121(1.046-1.202) | 0.0013   | <sup>13</sup>     | 1351/0                                                    |
| 20q13.13                                  | <i>SPATA2, RNF114</i>               | rs495337<br>rs1056198                | rs495337                            | 48522330  | A/G     | 0.839(0.814-0.864) | 3.43E-09 | <sup>5, 15</sup>  | 1078/215                                                  |
| 22q11.21                                  | <i>UBE2L3</i>                       | rs4821124                            | rs4821124                           | 21979289  | C/T     | 1.159(1.076-1.248) | 9.08E-05 | <sup>5</sup>      | 535/0                                                     |
| <b>Loci reported in Asian populations</b> |                                     |                                      |                                     |           |         |                    |          |                   |                                                           |
| 4q24                                      | <i>NFKB1</i>                        | rs1020760<br>rs1609798               | rs230503                            | 103492669 | A/G     | 0.923(0.893-0.955) | 0.0170   | <sup>17</sup>     | 835/0                                                     |
| 5q33.3                                    | <i>PTTG1</i>                        | rs2431697                            | rs2961918                           | 159901408 | A/C     | 1.111(1.075-1.149) | 0.0015   | <sup>18</sup>     | 1039/0                                                    |
| 8p23.2                                    | <i>CSMD1</i>                        | rs7007032                            | rs11136687                          | 3809504   | A/T     | 1.127(1.087-1.168) | 7.88E-04 | <sup>18</sup>     | 3475/0                                                    |
| 12p13.3                                   | Multiple genes:<br><i>CD27-LAG3</i> | rs758739<br>rs2243750                | rs111922468                         | 6556078   | T/C     | 1.121(1.08-1.163)  | 0.0020   | <sup>17</sup>     | 993/0                                                     |
| 13q12.11                                  | <i>GJB2</i>                         | rs3751385                            | rs7324150                           | 20698681  | A/G     | 0.878(0.84-0.917)  | 0.0029   | <sup>18</sup>     | 1133/0                                                    |
| 17q12                                     | <i>IKZF3</i>                        | rs10852936<br>rs12936231             | rs146489775                         | 38185192  | T/C     | 1.773(1.418-2.216) | 0.0103   | <sup>17</sup>     | 634/0                                                     |
| 18q22.1                                   | <i>SERPINB8</i>                     | rs514315                             | rs191358722                         | 61730218  | T/C     | 1.676(1.463-1.921) | 1.51E-04 | <sup>18</sup>     | 1215/0                                                    |
| 19q13.33                                  | <i>FUT2</i>                         | rs1047781                            | rs629504                            | 49223633  | C/G     | 0.845(0.819-0.871) | 4.14E-08 | <sup>19</sup>     | 1186/27                                                   |
| 19q13.41                                  | <i>ZNF816A</i>                      | rs12459008<br>rs9304742              | rs12459008                          | 53454789  | A/T     | 1.162(1.090-1.238) | 3.8E-06  | <sup>18, 19</sup> | 2016/13                                                   |

EA/RA=effect allele/reference allele; <sup>a</sup> indicate reported Asian SNVs.



**Table S7. Gene expression data in psoriasis and AD relating to candidate genes identified by comparative analysis**

***[Supplemental Table 7 provided as Excel file]***

Gene expression data available from published and publically available datasets are summarized for candidate genes.

## References

1. Weidinger, S., Willis-Owen, S.A., Kamatani, Y., Baurecht, H., Morar, N., Liang, L., Edser, P., Street, T., Rodriguez, E., O'Regan, G.M., et al. (2013). A genome-wide association study of atopic dermatitis identifies loci with overlapping effects on asthma and psoriasis. *Hum Mol Genet* 22, 4841-4856.
2. Esparza-Gordillo, J., Weidinger, S., Folster-Holst, R., Bauerfeind, A., Ruschendorf, F., Patone, G., Rohde, K., Marenholz, I., Schulz, F., Kerscher, T., et al. (2009). A common variant on chromosome 11q13 is associated with atopic dermatitis. *Nat Genet* 41, 596-601.
3. Ellinghaus, D., Baurecht, H., Esparza-Gordillo, J., Rodriguez, E., Matanovic, A., Marenholz, I., Hubner, N., Schaarschmidt, H., Novak, N., Michel, S., et al. (2013). High-density genotyping study identifies four new susceptibility loci for atopic dermatitis. *Nature Genetics* 45, 808-812.
4. Ellinghaus, D., Ellinghaus, E., Nair, R.P., Stuart, P.E., Esko, T., Metspalu, A., Debrus, S., Raelson, J.V., Tejasvi, T., Belouchi, M., et al. (2012). Combined analysis of genome-wide association studies for Crohn disease and psoriasis identifies seven shared susceptibility loci. *American Journal of Human Genetics* 90, 636-647.
5. Tsoi, L.C., Spain, S.L., Knight, J., Ellinghaus, E., Stuart, P.E., Capon, F., Ding, J., Li, Y., Tejasvi, T., Gudjonsson, J.E., et al. (2012). Identification of 15 new psoriasis susceptibility loci highlights the role of innate immunity. *Nature Genetics* 44, 1341-1348.
6. Knight, J., Spain, S.L., Capon, F., Hayday, A., Nestle, F.O., Clop, A., Wellcome Trust Case Control, C., Genetic Analysis of Psoriasis, C., Consortium, I.c.f.P., Barker, J.N., et al. (2012). Conditional analysis identifies three novel major histocompatibility complex loci associated with psoriasis. *Hum Mol Genet* 21, 5185-5192.
7. Genetic Analysis of Psoriasis Consortium, Wellcome Trust Case Control Consortium, Strange, A., Capon, F., Spencer, C.C., Knight, J., Weale, M.E., Allen, M.H., Barton, A., Band, G., et al. (2010). A genome-wide association study identifies new psoriasis susceptibility loci and an interaction between HLA-C and ERAP1. *Nature Genetics* 42, 985-990.
8. Nair, R.P., Duffin, K.C., Helms, C., Ding, J., Stuart, P.E., Goldgar, D., Gudjonsson, J.E., Li, Y., Tejasvi, T., Feng, B.J., et al. (2009). Genome-wide scan reveals association of psoriasis with IL-23 and NF-kappaB pathways. *Nature Genetics* 41, 199-204.
9. Sun, L.D., Xiao, F.L., Li, Y., Zhou, W.M., Tang, H.Y., Tang, X.F., Zhang, H., Schaarschmidt, H., Zuo, X.B., Foelster-Holst, R., et al. (2011). Genome-wide association study identifies two new susceptibility loci for atopic dermatitis in the Chinese Han population. *Nat Genet* 43, 690-694.
10. Hirota, T., Takahashi, A., Kubo, M., Tsunoda, T., Tomita, K., Sakashita, M., Yamada, T., Fujieda, S., Tanaka, S., Doi, S., et al. (2012). Genome-wide association study identifies eight new susceptibility loci for atopic dermatitis in the Japanese population. *Nat Genet* 44, 1222-1226.
11. Paternoster, L., Standl, M., Chen, C.M., Ramasamy, A., Bonnelykke, K., Duijts, L., Ferreira, M.A., Alves, A.C., Thyssen, J.P., Albrecht, E., et al. (2011). Meta-analysis of genome-wide association studies identifies three new risk loci for atopic dermatitis. *Nature Genetics* 44, 187-192.
12. Zhang, X.J., Huang, W., Yang, S., Sun, L.D., Zhang, F.Y., Zhu, Q.X., Zhang, F.R., Zhang, C., Du, W.H., Pu, X.M., et al. (2009). Psoriasis genome-wide association study identifies susceptibility variants within LCE gene cluster at 1q21. *Nature Genetics* 41, 205-210.
13. Stuart, P.E., Nair, R.P., Ellinghaus, E., Ding, J., Tejasvi, T., Gudjonsson, J.E., Li, Y., Weidinger, S., Eberlein, B., Gieger, C., et al. (2010). Genome-wide association analysis identifies three psoriasis susceptibility loci. *Nature Genetics* 42, 1000-1004.

14. Ellinghaus, E., Ellinghaus, D., Stuart, P.E., Nair, R.P., Debrus, S., Raelson, J.V., Belouchi, M., Fournier, H., Reinhard, C., Ding, J., et al. (2010). Genome-wide association study identifies a psoriasis susceptibility locus at TRAF3IP2. *Nature Genetics* 42, 991-995.
15. Capon, F., Bijlmakers, M.J., Wolf, N., Quaranta, M., Huffmeier, U., Allen, M., Timms, K., Abkevich, V., Gutin, A., Smith, R., et al. (2008). Identification of ZNF313/RNF114 as a novel psoriasis susceptibility gene. *Human molecular genetics* 17, 1938-1945.
16. Liu, Y., Helms, C., Liao, W., Zaba, L.C., Duan, S., Gardner, J., Wise, C., Miner, A., Malloy, M.J., Pullinger, C.R., et al. (2008). A genome-wide association study of psoriasis and psoriatic arthritis identifies new disease loci. *PLoS Genet* 4, e1000041.
17. Sheng, Y., Jin, X., Xu, J., Gao, J., Du, X., Duan, D., Li, B., Zhao, J., Zhan, W., Tang, H., et al. (2014). Sequencing-based approach identified three new susceptibility loci for psoriasis. *Nature communications* 5, 4331.
18. Sun, L.D., Cheng, H., Wang, Z.X., Zhang, A.P., Wang, P.G., Xu, J.H., Zhu, Q.X., Zhou, H.S., Ellinghaus, E., Zhang, F.R., et al. (2010). Association analyses identify six new psoriasis susceptibility loci in the Chinese population. *Nature genetics* 42, 1005-1009.
19. Tang, H., Jin, X., Li, Y., Jiang, H., Tang, X., Yang, X., Cheng, H., Qiu, Y., Chen, G., Mei, J., et al. (2014). A large-scale screen for coding variants predisposing to psoriasis. *Nature genetics* 46, 45-50.
